# Supplementary material for: In Silico Investigation of Cytochrome P450 2C9 in relation to Aging Using Traditional Chinese Medicine
Source: Hindawi journal article supplement (doi:10.1155/2014/404505), 2014-01-01
Supplement: f1 [file 404505.f1.pdf]

**Table S1.** The molecular structures of training set and test set.

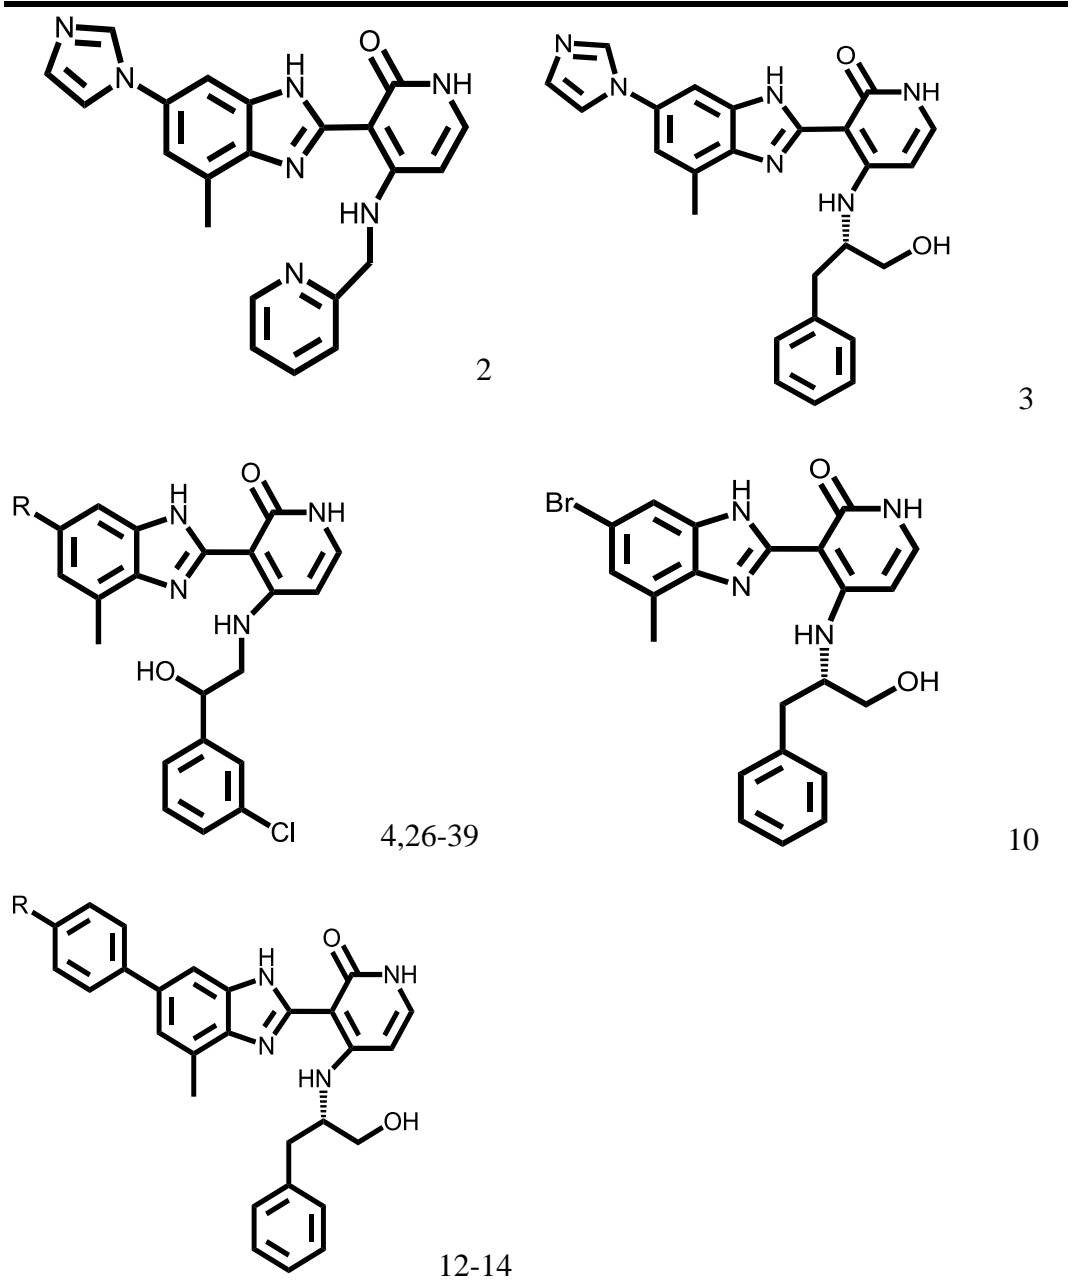

| Name | R         | IC <sub>50</sub> ( $\mu$ M) |
|------|-----------|-----------------------------|
| 2    | -         | 0.03                        |
| 3    | -         | 0.04                        |
| 4    | Imidazole | 0.04                        |
| 10   | -         | 0.72                        |
| 12   | H         | 2.3                         |
| 13   | F         | 4                           |
| 14   | OMe       | 11                          |
| 26   | H         | 1.5                         |

|    |                                                                                     |     |
|----|-------------------------------------------------------------------------------------|-----|
| 28 | CONH2                                                                               | 2.9 |
| 29 | CONHMe                                                                              | 2.8 |
| 30 | CONH-cyclopropyl                                                                    | 8.1 |
| 31 | CONH-cyclopentyl                                                                    | 3.5 |
| 32 | CONH-cyclohexyl                                                                     | 6.6 |
| 34 | 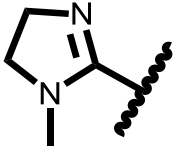   | 91  |
| 35 |    | 67  |
| 36 |   | 47  |
| 37 |  | 100 |
| 38 |  | 76  |
| 39 |  | 7.8 |

---

**Table S2.** The results of GA analysis

| No. | equations                                                                                                                          | r <sup>2</sup> |
|-----|------------------------------------------------------------------------------------------------------------------------------------|----------------|
| 1   | GFATempModel_1 = 9.3969 + 4.6637 * ALogP - 1.5025 * ES_Sum_dssC - 4.0939 * LogD + 0.0089932 * Jurs_DPSA_1 - 0.27175 * Jurs_WPSA_3  | 0.9581         |
| 2   | GFATempModel_2 = 4.0101 + 3.5372 * ALogP - 1.1951 * ES_Sum_dssC - 3.3068 * LogD + 0.0049456 * Jurs_WNSA_2 + 6.5271 * Shadow_XYfrac | 0.9339         |
| 3   | GFATempModel_3 = 8.5756 + 4.3024 * ALogP - 1.3209 * ES_Sum_dssC - 3.8914 * LogD + 0.0036944 * Jurs_WNSA_2 - 0.078142 * Jurs_WPSA_3 | 0.9330         |
| 4   | GFATempModel_4 = 7.8675 + 4.8378 * ALogP - 0.84583 * ES_Sum_dssC - 4.2679 * LogD - 0.19529 * Dipole_Y - 0.15792 * Jurs_WPSA_3      | 0.9319         |
| 5   | GFATempModel_5 = 9.0886 + 4.6533 * ALogP - 1.4796 * ES_Sum_dssC - 4.2905 * LogD + 0.07713 * Jurs_WNSA_3 - 0.090269 * Jurs_WPSA_3   | 0.9257         |
| 6   | GFATempModel_6 = 5.862 + 3.9645 * ALogP - 1.3775 * ES_Sum_dssC - 3.6419 * LogD + 0.0053017 * Jurs_WNSA_2 + 3.035 * Shadow_XZfrac   | 0.9239         |
| 7   | GFATempModel_7 = 7.8349 + 3.5551 * ALogP - 1.5214 * ES_Sum_dssC - 3.3755 * LogD + 0.71979 * CHI_V_3_C + 0.0063963 * Jurs_WNSA_2    | 0.9234         |
| 8   | GFATempModel_8 = 7.5854 + 3.6834 * ALogP + 0.040597 * ES_Sum_dO - 1.114 * ES_Sum_dssC - 3.4473 * LogD + 0.0065086 * Jurs_WNSA_2    | 0.9233         |
| 9   | GFATempModel_9 = 190.57 + 5.1477 * ALogP - 1.1876 * ES_Sum_dssC - 4.3839 * LogD - 36.982 * CIC - 186.63 * SIC                      | 0.9204         |
| 10  | GFATempModel_10 = 8.1637 + 4.2035 * ALogP - 1.4532 * ES_Sum_dssC - 3.8642 * LogD - 0.70976 * CIC + 0.0053265 * Jurs_WNSA_2         | 0.9179         |
